# Supplementary material for: Antimicrobial Peptide Arsenal Predicted from the Venom Gland Transcriptome of the Tropical Trap-Jaw Ant Odontomachus chelifer
Source: MDPI journal article supplement (doi:10.3390/toxins15050345), 2023-05-18
Supplement: s1 [file s1]

# Supplementary Materials: Antimicrobial Peptide Arsenal Predicted from the Venom Gland Transcriptome of the Tropical Trap-Jaw Ant *Odontomachus chelifer*

Josilene J. Menk, Yan E. Matuhara, Henrique Sebestyen-França, Flávio Henrique-Silva, Milene Ferro, Renata Santos Rodrigues and Célio D. Santos-Júnior

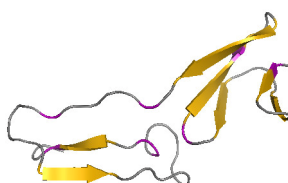

**Figure S1.** Tridimensional structure prediction with marked cysteine residues of the putative poneratoxin ICK-like toxin homolog of *O. chelifer* (TRINITY\_DN24839\_c0\_g1\_i1.p1). Yellow: strand. Gray: turns. Purple: cysteine residues.

|                               |     |                                                       |                                                           |                  |
|-------------------------------|-----|-------------------------------------------------------|-----------------------------------------------------------|------------------|
|                               | 1   | 10                                                    | 20                                                        | 30               |
| 1 Omo_Abaecin_A0A348G6C5      | FRV | <b>P</b> <b>P</b> <b>P</b> <b>R</b> <b>S</b> <b>E</b> | <b>P</b> GGWKGPNEPQGPFN <b>P</b> K                        | .....FG <b>K</b> |
| 2 TRINITY_DN21408_c0_g1_i1.p1 | IPT | <b>P</b> <b>A</b> <b>P</b> <b>V</b> <b>A</b>          | <b>P</b> GAITAYPIQRPAY <b>A</b> PNPWVYPKPTTVQPI <b>R</b>  |                  |
| 3 TRINITY_DN16370_c0_g1_i1.p1 | ISQ | <b>P</b> <b>L</b> <b>P</b> <b>P</b> <b>T</b>          | <b>P</b> ...SGHVINKRVAPI <b>P</b> R...PVPTVIGLLM <b>K</b> |                  |

**Figure S2.** Primary sequence alignment between two predicted AMP sequences from *O. chelifer* and the A0A348G6C5 abaecin from *O. monticola*. Similar residues are boxed. Identical residues are bolded. The red line indicates the PXP/PXXP motifs.

|                             |     |     |     |     |     |     |   |   |   |   |   |     |     |   |   |   |     |     |   |   |   |   |   |     |     |   |   |   |   |   |   |   |   |   |   |   |     |   |     |     |   |   |   |   |   |   |   |   |   |   |   |   |   |   |   |     |   |
|-----------------------------|-----|-----|-----|-----|-----|-----|---|---|---|---|---|-----|-----|---|---|---|-----|-----|---|---|---|---|---|-----|-----|---|---|---|---|---|---|---|---|---|---|---|-----|---|-----|-----|---|---|---|---|---|---|---|---|---|---|---|---|---|---|---|-----|---|
|                             | 1   | 10  | 20  | 30  | 40  | 50  |   |   |   |   |   |     |     |   |   |   |     |     |   |   |   |   |   |     |     |   |   |   |   |   |   |   |   |   |   |   |     |   |     |     |   |   |   |   |   |   |   |   |   |   |   |   |   |   |   |     |   |
| Lni_Crustin4_A0A0J7L9H5     | M   | R   | G   | N   | S   | L   | Y | L | L | L | F | V   | I   | L | T | K | A   | Y   | V | K | S | C | K | Y   | W   | C | K | M | G | H | H | R | Y | Y | C | C | P   | N | G   | ... | K | N | D | S | S | S | E | H | S | W | H | S | F | L | F | P   | W |
| TRINITY_DN17655_c0_g1_i1.p1 | M   | R   | R   | F   | R   | A   | I | N | L | I | A | F   | C   | A | L | V | L   | L   | A | D | D | S | S | A   | ... | T | V | F | Y | N | L | K | N | Y | L | P | ... | G | F   | L   | R | S | F | K | Q | L | K | T | L | R | Y | G | I | V | P | G   | T |
| TRINITY_DN12961_c0_g1_i1.p1 | ... | M   | A   | R   | L   | I   | N | V | V | M | I | I   | G   | M | V | L | V   | S   | V | F | A | A | E | ... | E   | L | Y | S | D | K | Y | D | D | I | D | V | M   | G | I   | L   | T | N | D | R | L | R | D | Q | Y | F | K | C | F | M | D | ... |   |
|                             | 60  | 70  | 80  | 90  | 100 |     |   |   |   |   |   |     |     |   |   |   |     |     |   |   |   |   |   |     |     |   |   |   |   |   |   |   |   |   |   |   |     |   |     |     |   |   |   |   |   |   |   |   |   |   |   |   |   |   |   |     |   |
| Lni_Crustin4_A0A0J7L9H5     | F   | W   | E   | G   | I   | V   | G | S | H | A | E | H   | P   | W | H | E | V   | ... | E | K | M | K | W | K   | P   | K | K | Q | C | P | P | L | R | P | Q | C | P   | R | M   | ... | Y | E | W | Y | K | P | P | K | Y | C | D | S | D |   |   |     |   |
| TRINITY_DN17655_c0_g1_i1.p1 | L   | W   | G   | C   | P   | G   | N | I | A | S | N | ... | Y   | S | E | L | ... | G   | V | N | W | K | L | D   | T   | C | C | R | A | H | D | S | C | N | D | L | I   | R | P   | R   | N | S | K | Y | G | L | Y | N | S | S | K | L | C | S | S |     |   |
| TRINITY_DN12961_c0_g1_i1.p1 | ... | T   | G   | P   | C   | T   | A | D | M | K | F | Y   | K   | D | I | I | G   | E   | G | V | V | T | K | C   | K   | K | C | T | E | K | Q | K | E | N | L | D | T   | L | ... | T   | D | W | Y | T | K | N | R | L | D | D | W | N |   |   |   |     |   |
|                             | 110 | 120 | 130 |     |     |     |   |   |   |   |   |     |     |   |   |   |     |     |   |   |   |   |   |     |     |   |   |   |   |   |   |   |   |   |   |   |     |   |     |     |   |   |   |   |   |   |   |   |   |   |   |   |   |   |   |     |   |
| Lni_Crustin4_A0A0J7L9H5     | H   | E   | C   | E   | G   | E   | G | K | C | C | Y | D   | V   | C | L | E | H   | K   | T | C | K | T | A | E   |     |   |   |   |   |   |   |   |   |   |   |   |     |   |     |     |   |   |   |   |   |   |   |   |   |   |   |   |   |   |   |     |   |
| TRINITY_DN17655_c0_g1_i1.p1 | ... | ... | ... | ... | ... | ... | L | L | C | Q | C | D   | L   | Q | F | Y | ... |     |   |   |   |   |   |     |     |   |   |   |   |   |   |   |   |   |   |   |     |   |     |     |   |   |   |   |   |   |   |   |   |   |   |   |   |   |   |     |   |
| TRINITY_DN12961_c0_g1_i1.p1 | T   | F   | V   | K   | K   | ... | L | M | E | D | F | K   | ... |   |   |   |     |     |   |   |   |   |   |     |     |   |   |   |   |   |   |   |   |   |   |   |     |   |     |     |   |   |   |   |   |   |   |   |   |   |   |   |   |   |   |     |   |

Whole Body      Body and Venom Gland

**Figure S3.** Global alignment between the reference crustin and the grouped candidate AMP sequences. The color specifies the source tissue. The gray line indicates the signal peptide of the reference AMP.

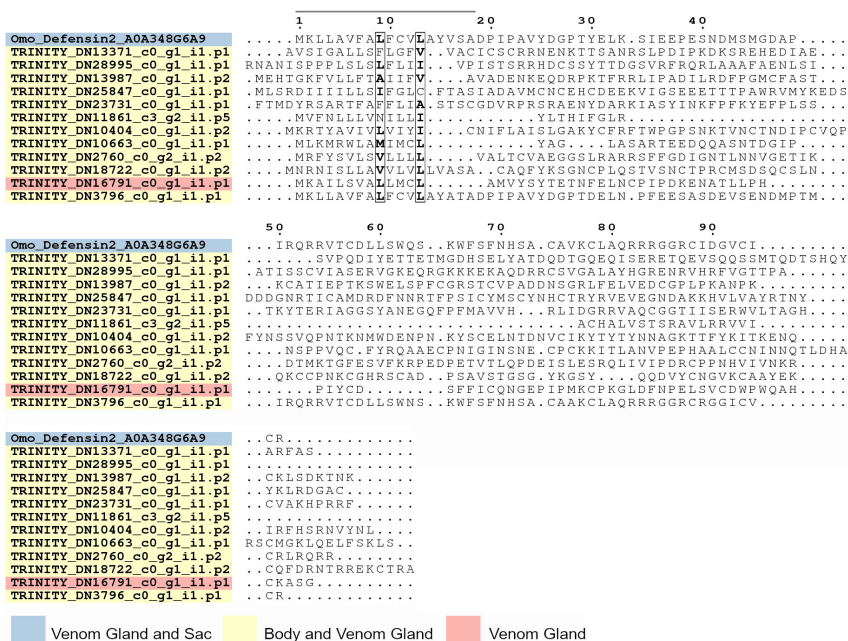

**Figure S4.** Global alignment between the reference defensin and the grouped candidate AMP sequences. The color specifies the source tissue. The gray line indicates the signal peptide of the reference AMP.

|                              |                 |                         |                 |                       |                          |                  |
|------------------------------|-----------------|-------------------------|-----------------|-----------------------|--------------------------|------------------|
|                              | 1               | 10                      | 20              | 30                    | 40                       |                  |
| Omo Hymenoptaecin A0A348G6C2 | .....MKLLVSL    | LAALSCAIVYASADLT        | GDQVLPQSPG      | VPVLPHTSRFP           | READP                    |                  |
| TRINITY_DN10137_c1.g1.i1.p5  | .....FFFFF      | FFFFFLCDSP              | .....           | VPNLNCRW              | .....                    |                  |
| TRINITY_DN1540_c0.g2.i1.p1   | .....AAVF       | ALLCVTDVTAI             | .....           | RSDDGCGN              | .....                    |                  |
| TRINITY_DN1886_c2.g8.i1.p8   | .....ERERERE    | GENVCMCV                | CVCVCVCARA      | .....                 | CVCTR                    |                  |
| TRINITY_DN4362_c0.g1.i1.p2   | .....MKLIT      | LMIAVVLST               | .....           | TVTGTGD               | .....                    |                  |
| TRINITY_DN9325_c1.g1.i1.p2   | .....NRLTNV     | VFLSV                   | LGTELMKMTV      | .....                 | CPYKCKRCSL               |                  |
| TRINITY_DN11193_c0.g4.i1.p2  | .....RYFHCS     | LRFPPL                  | CLASDFIVCFDL    | .....                 | SRPKKEKKLVISKRYKINTK     |                  |
| TRINITY_DN28762_c0.g1.i1.p2  | .....MKAIVV     | VLAI                    | CFAAALGEFT      | DEEKEKLKTYKESCISE     | TGVDPNVVKNA              |                  |
| TRINITY_DN6307_c0.g1.i1.p1   | .....ARQTA      | LVLF                    | FGDFIVARAR      | .....                 | DKTSDDLRTA               |                  |
| TRINITY_DN12005_c4.g1.i1.p15 | .....MLCV       | CMCV                    | CAIQVDER        | .....                 | EK                       |                  |
| TRINITY_DN1280_c0.g1.i1.p7   | .....MLCDMF     | QIDAVAFV                | ALLINQYSSCRPI   | .....                 | SHLHHIRCAL               |                  |
| TRINITY_DN26077_c0.g1.i1.p1  | .....IHPTV      | FSVLE                   | WLGYNCSAIN      | .....                 | PCYIALF                  |                  |
| TRINITY_DN168_c0.g1.i1.p2    | .....NSTFILY    | DRIT                    | GMIVALFI        | .....                 | VIAVTSSSR                |                  |
| TRINITY_DN22786_c0.g1.i1.p1  | .....LFLSL      | LSL                     | FFSICLSSTTL     | LLFRSARTQSAENNKD      | VEGQRLLRVQFAG            |                  |
| TRINITY_DN23188_c0.g1.i1.p1  | .....FARIF      | VF                      | FFSLLTSLVK      | .....                 | MATASITGV                |                  |
| TRINITY_DN1980_c0.g1.i1.p1   | .....IVLV       | LVLL                    | LECUVVIGLAC     | .....                 | GFRDAEKG                 |                  |
| TRINITY_DN8792_c0.g1.i1.p3   | .....DIRDWR     | LAL                     | LIFLSTREFT      | .....                 | DGMTSS                   |                  |
| TRINITY_DN5860_c0.g1.i1.p2   | .....PPIDDEY    | MGGICAA                 | FLFQLSFATISTT   | .....                 | IVSGMAEERCNF             |                  |
| TRINITY_DN26054_c0.g1.i1.p1  | .....HVS        | TGCVVLL                 | LFYKCVLPST      | .....                 | LVSFSGSTLVRGRVDS         |                  |
| TRINITY_DN4617_c0.g1.i1.p1   | .....SPSASAST   | MHRPRGR                 | QSFLE           | CLFPYTSCEF            | .....                    |                  |
| TRINITY_DN15646_c0.g1.i1.p3  | .....MRCVRC     | WV                      | VIKCVFACLT      | .....                 | GRGTGGV                  |                  |
| TRINITY_DN1241_c0.g1.i1.p2   | .....MTAFLH     | GLMIV                   | LI              | IINAFTLIGS            | .....                    |                  |
| TRINITY_DN26693_c0.g1.i1.p3  | .....MEENEVR    | GILV                    | FLVLAACIGPAL    | .....                 | SITSACR                  |                  |
| TRINITY_DN23671_c0.g1.i1.p2  | .....GTRAL      | ALAL                    | ALSICIOGCI      | .....                 | VRRGRCCAM                |                  |
| TRINITY_DN1222_c0.g1.i1.p3   | .....PLNARN     | VAS                     | FLSLLLEALR      | .....                 | AD                       |                  |
| TRINITY_DN13204_c0.g1.i1.p1  | .....CVVLV      | LVV                     | VVVVIVKVT       | .....                 | DTQEAASRASW              |                  |
| TRINITY_DN10866_c0.g4.i1.p9  | .....TNSSVP     | VNGLV                   | ISVLCYFAAPFS    | .....                 | PVSVRPERF                |                  |
| TRINITY_DN21005_c2.g1.i1.p4  | .....SLSLSL     | LSLSL                   | SLFLLTFSSLFF    | .....                 | SDPRVQIVRAIIAISSLDERHSGE |                  |
| TRINITY_DN13289_c0.g1.i1.p2  | .....MRATW      | LV                      | LILAEILPPLSL    | .....                 | LGEAVCHRN                |                  |
| TRINITY_DN1481_c0.g1.i1.p6   | .....MYLMLG     | MALIAM                  | CFNLMQEEVI      | .....                 | .....                    |                  |
| TRINITY_DN18603_c0.g1.i1.p1  | .....MLAAS      | PILLV                   | LYLSFPRSAGFF    | REGSLFLRRLSRTASFF     | LNLRNHTF                 |                  |
| TRINITY_DN24006_c0.g1.i1.p1  | .....MKLLV      | LV                      | CLVFVAISV       | .....                 | ATGNRYFAK                |                  |
| TRINITY_DN1844_c0.g3.i3.p1   | .....MKFYV      | CL                      | LLVIMILSLV      | .....                 | PEDLCQE                  |                  |
| TRINITY_DN1674_c8.g1.i1.p17  | .....MWCRL      | TL                      | LLLVCCCHLAA     | .....                 | ASKRIRVDGK               |                  |
| TRINITY_DN27940_c0.g1.i1.p1  | .....MAPARLL    | LL                      | LVSLMLVFAN      | .....                 | .....                    |                  |
|                              | 50              | 60                      | 70              | 80                    | 90                       | 100              |
| Omo Hymenoptaecin A0A348G6C2 | QNSISFQ         | ....GSQPLSGPNRQPTW      | DLNVNVRNIANNDRS | RTDIFGGIGKAPGQSAQPHIG |                          |                  |
| TRINITY_DN10137_c1.g1.i1.p5  | KERRRKE         | ....QSAASSRL            | .....ACFVSTV    | VLVCPVETEKYR          | .....                    |                  |
| TRINITY_DN1540_c0.g2.i1.p1   | GMFRCDN         | ....GKCIQSILVCDYRGDCDDN | .....SDEM       | QSCPPDCDFGQI          | .....                    |                  |
| TRINITY_DN1886_c2.g8.i1.p8   | RTTCVMT         | .....                   | HVRSICV         | CVVLACVNV             | .....                    |                  |
| TRINITY_DN4362_c0.g1.i1.p2   | DEYIHLF         | ....GKSCSDAPP           | CPDGRPCVM       | .....APPRCN           | VGTGKDLVPTCGRR           | ..               |
| TRINITY_DN9325_c1.g1.i1.p2   | DEFPHEQL        | ....LQOHR               | LYHHGARERARS    | NARWNETILSF           | FTYTCTPC                 | HDVTTYTKPGNLK    |
| TRINITY_DN11193_c0.g4.i1.p2  | HEKKVNR         | ....VNSSQ               | ETTRGKISV       | VYILLHL               | SLAADGKKNC               | SVHQTGLGKARNNRND |
| TRINITY_DN28762_c0.g1.i1.p2  | KEGMIDE         | ....SDEKL               | ACFSTCLF        | KKFGVMKENG            | IDITD                    | TARSKISSNV       |
| TRINITY_DN6307_c0.g1.i1.p1   | DFLRLVE         | ....                    | .....RRPKID     | TPRLKIAKLARPCAPRW     |                          |                  |
| TRINITY_DN12005_c4.g1.i1.p15 | EGGKGIR         | ....                    | .....DKDK       | KILKIKTQ              | LLTIAKKRHSA              |                  |
| TRINITY_DN1280_c0.g1.i1.p7   | NCTQSYT         | ....LARKP               | SNFCKQKRN       | .....QAKL             | MDAFATTC                 | VARDAQCPRYL      |
| TRINITY_DN26077_c0.g1.i1.p1  | SKDFRFA         | ....PKRI                | ICKCFCKR        | .....RANT             | LRGSDGQLAMRNSP           | SPS              |
| TRINITY_DN168_c0.g1.i1.p2    | DYFRARA         | ....VDKL                | CKRTSAATMTSL    | .....NRGT             | VIATPRSL                 | TREKOPRA         |
| TRINITY_DN22786_c0.g1.i1.p1  | RSSRKWS         | ....LSS                 | ASKETSASYDIL    | DLRLSSSRKSR           | RRPKVAGGT                | RFPAPEKSSRIE     |
| TRINITY_DN23188_c0.g1.i1.p1  | SFYARAA         | ....LHAAT               | WCYTVIH         | .....RARY             | IEVSTFE                  | VDIFASCTKRKN     |
| TRINITY_DN1980_c0.g1.i1.p1   | QDFLKST         | ....IKYY                | ATTAD           | .....KAET             | VTVAWDG                  | IMSQFHCCGVES     |
| TRINITY_DN8792_c0.g1.i1.p3   | KLQKRIA         | ....                    | .....ASVM       | RCGKKKSMVR            | SK                       | .....            |
| TRINITY_DN5860_c0.g1.i1.p2   | KAYCIFS         | ....FLNT                | IVYCLPAGV       | VWGDHGF               | .....LNR                 | MGVVDIAGSGPVHLV  |
| TRINITY_DN26054_c0.g1.i1.p1  | RTDLALS         | SRASQFSR                | KISRRANCCG      | KDRNVPR               | .....HFPT                | MRCEFLAIFARI     |
| TRINITY_DN4617_c0.g1.i1.p1   | LRPAAVIT        | TGGAETG                 | VILAPTL         | RATNSLIGN             | NGGDTARK                 | RGRGEPVNLIR      |
| TRINITY_DN15646_c0.g1.i1.p3  | FVYRLQN         | ....DEDS                | QDSSASEALDH     | .....RAQ              | IYRGTSRPT                | ITRLSALRPTW      |
| TRINITY_DN1241_c0.g1.i1.p2   | TANHPIF         | ....PRHY                | PTTSKIAST       | PLYTTPRI              | IDTFAK                   | SEVKCPTGQKDK     |
| TRINITY_DN26693_c0.g1.i1.p3  | NVVCISR         | ....ITMRA               | PRDIPDRP        | VDVFGHA               | .....ISM                 | QIVLSFADDT       |
| TRINITY_DN23671_c0.g1.i1.p2  | HSVCGVT         | ....TRDT                | SRVLKACQL       | .....EVH              | PELVHTSA                 | FDGFFERPRAVK     |
| TRINITY_DN1222_c0.g1.i1.p3   | QTSRPGA         | ....                    | .....AVVT       | KRRNTL                | LGSGKKIK                 | .....            |
| TRINITY_DN13204_c0.g1.i1.p1  | KKRLTR          | TNSPPG                  | INGPKKRPL       | LIRTIKQADR            | KFLRPDNRAA               | AAKRLHASTFV      |
| TRINITY_DN10866_c0.g4.i1.p9  | EIFQVTR         | ....                    | .....KKKS       | AI                    | .....                    |                  |
| TRINITY_DN12005_c2.g1.i1.p4  | RAFPSSH         | ....VPRE                | LLYPNGPCARASV   | .....FGK              | GELVRGES                 | MIYTSRRDR        |
| TRINITY_DN13289_c0.g1.i1.p2  | DTDLSAG         | ....TNTG                | QORSGETSS       | .....RRR              | RELAF                    | PKGSFAFV         |
| TRINITY_DN1481_c0.g1.i1.p6   | STTRSFL         | ....VPD                 | LLRCP           | SVAAPPEL              | GDPRRS                   | .....QSR         |
| TRINITY_DN18603_c0.g1.i1.p1  | QGSCCPA         | ....LPV                 | QFCGHSCF        | VDSHCAGIG             | KCCPTQ                   | CGGSI            |
| TRINITY_DN24006_c0.g1.i1.p1  | EDGRSR          | ....LGE                 | LRNYP           | IVVM                  | .....LSK                 | AKPVCEGGQRLAMEK  |
| TRINITY_DN1844_c0.g3.i3.p1   | SYTVSAY         | ....QED                 | CRKYVMCSE       | GRCKLETCE             | TYFFDP                   | ITSTCTH          |
| TRINITY_DN1674_c8.g1.i1.p17  | EGMPLS          | ....FFK                 | .....           | .....RTRP             | QSKCP                    | PGVYRHTRTGCREIL  |
|                              | 110             | 120                     | 130             | 140                   | 150                      | 160              |
| Omo Hymenoptaecin A0A348G6C2 | IQHERNLGRNGFIRG | SGQLQPGYGG              | RGLTPSFGVTGGL   | RFRREAEADAK           | DEDDTELIEE               |                  |
| TRINITY_DN10137_c1.g1.i1.p5  | .....           | .....                   | .....           | .....                 | .....                    |                  |
| TRINITY_DN1540_c0.g2.i1.p1   | .....           | .....                   | .....           | .....                 | .....                    |                  |
| TRINITY_DN1886_c2.g8.i1.p8   | .....           | .....                   | .....           | .....                 | .....                    |                  |
| TRINITY_DN4362_c0.g1.i1.p2   | .....           | .....                   | .....           | .....                 | .....                    |                  |
| TRINITY_DN9325_c1.g1.i1.p2   | .....           | .....                   | .....           | .....                 | .....                    |                  |
| TRINITY_DN11193_c0.g4.i1.p2  | .....           | .....                   | .....           | .....                 | .....                    |                  |
| TRINITY_DN28762_c0.g1.i1.p2  | .....           | .....                   | .....           | .....                 | .....                    |                  |
| TRINITY_DN6307_c0.g1.i1.p1   | .....           | .....                   | .....           | .....                 | .....                    |                  |
| TRINITY_DN12005_c4.g1.i1.p15 | .....           | .....                   | .....           | .....                 | .....                    |                  |
| TRINITY_DN1280_c0.g1.i1.p7   | .....           | .....                   | .....           | .....                 | .....                    |                  |
| TRINITY_DN26077_c0.g1.i1.p1  | .....           | .....                   | .....           | .....                 | .....                    |                  |
| TRINITY_DN168_c0.g1.i1.p2    | .....           | .....                   | .....           | .....                 | .....                    |                  |
| TRINITY_DN22786_c0.g1.i1.p1  | .....           | .....                   | .....           | .....                 | .....                    |                  |
| TRINITY_DN23188_c0.g1.i1.p1  | .....           | .....                   | .....           | .....                 | .....                    |                  |
| TRINITY_DN1980_c0.g1.i1.p1   | .....           | .....                   | .....           | .....                 | .....                    |                  |
| TRINITY_DN8792_c0.g1.i1.p3   | .....           | .....                   | .....           | .....                 | .....                    |                  |
| TRINITY_DN5860_c0.g1.i1.p2   | .....           | .....                   | .....           | .....                 | .....                    |                  |
| TRINITY_DN26054_c0.g1.i1.p1  | .....           | .....                   | .....           | .....                 | .....                    |                  |
| TRINITY_DN4617_c0.g1.i1.p1   | .....           | .....                   | .....           | .....                 | .....                    |                  |
| TRINITY_DN15646_c0.g1.i1.p3  | .....           | .....                   | .....           | .....                 | .....                    |                  |
| TRINITY_DN1241_c0.g1.i1.p2   | .....           | .....                   | .....           | .....                 | .....                    |                  |
| TRINITY_DN26693_c0.g1.i1.p3  | .....           | .....                   | .....           | .....                 | .....                    |                  |
| TRINITY_DN23671_c0.g1.i1.p2  | .....           | .....                   | .....           | .....                 | .....                    |                  |
| TRINITY_DN1222_c0.g1.i1.p3   | .....           | .....                   | .....           | .....                 | .....                    |                  |
| TRINITY_DN13204_c0.g1.i1.p1  | .....           | .....                   | .....           | .....                 | .....                    |                  |
| TRINITY_DN10866_c0.g4.i1.p9  | .....           | .....                   | .....           | .....                 | .....                    |                  |
| TRINITY_DN12005_c2.g1.i1.p4  | .....           | .....                   | .....           | .....                 | .....                    |                  |
| TRINITY_DN13289_c0.g1.i1.p2  | .....           | .....                   | .....           | .....                 | .....                    |                  |
| TRINITY_DN1481_c0.g1.i1.p6   | .....           | .....                   | .....           | .....                 | .....                    |                  |
| TRINITY_DN18603_c0.g1.i1.p1  | .....           | .....                   | .....           | .....                 | .....                    |                  |
| TRINITY_DN24006_c0.g1.i1.p1  | .....           | .....                   | .....           | .....                 | .....                    |                  |
| TRINITY_DN1844_c0.g3.i3.p1   | .....           | .....                   | .....           | .....                 | .....                    |                  |
| TRINITY_DN1674_c8.g1.i1.p17  | .....           | .....                   | .....           | .....                 | .....                    |                  |
| TRINITY_DN27940_c0.g1.i1.p1  | .....           | .....                   | .....           | .....                 | .....                    |                  |

Venom Gland and Sac
Body and Venom Gland
Venom Gland



**Figure S5.** Global alignment between the reference hymenoptaecin and the grouped candidate AMP sequences. The color specifies the source tissue. The gray line indicates the signal peptide of the reference AMP.

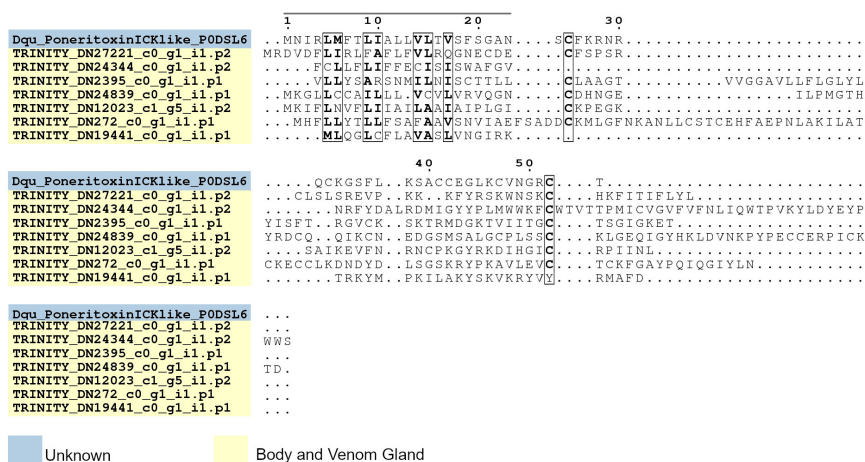

**Figure S6.** Global alignment between the reference ICK-type AMP and the grouped candidate AMP sequences. The color specifies the source tissue. The gray line indicates the signal peptide of the reference AMP.

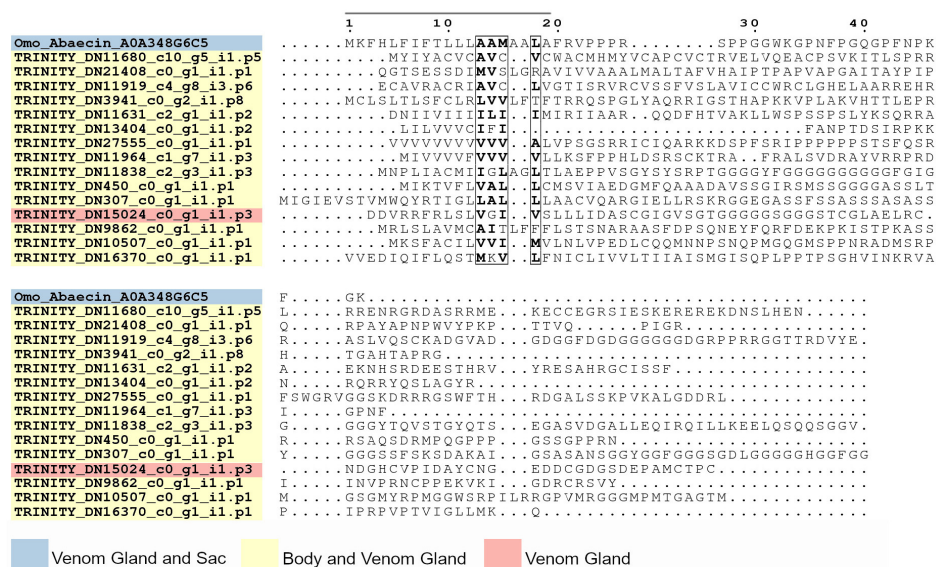

**Figure S7.** Global alignment between the reference abaecin and the grouped candidate AMP sequences. The color specifies the source tissue. The gray line indicates the signal peptide of the reference AMP.
